# Supplementary material for: Pressurized IntraPeritoneal Aerosol Chemotherapy (PIPAC) for the treatment of malignant mesothelioma
Source: Springer Nature journal article supplement (doi:10.1186/s12885-018-4363-0), 2018-04-18

# Supplementary Figure S1

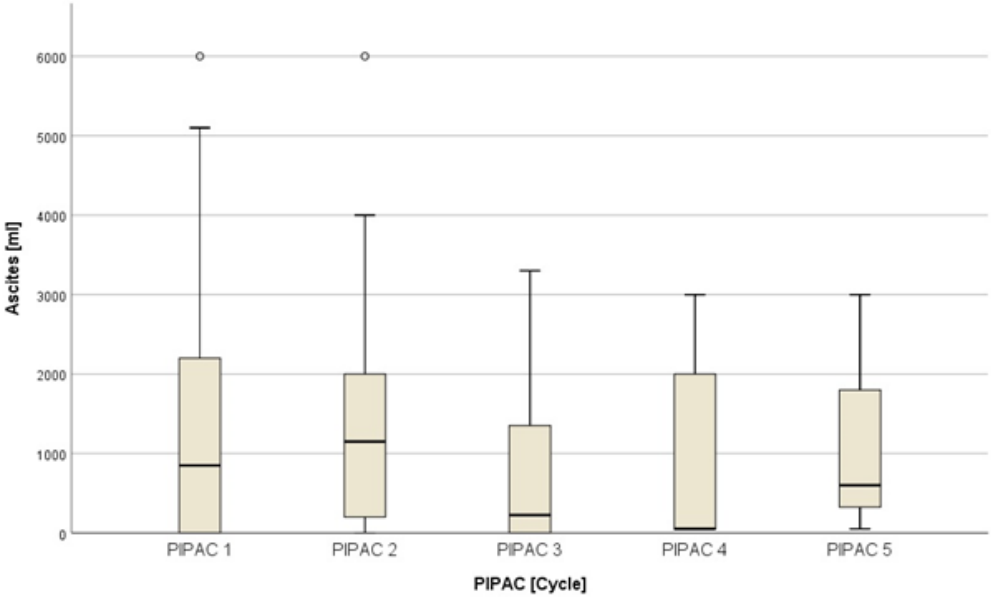

Supplement: MOESM1 [file 15703322]
